# Supplementary material
Source: PubMed Central journal article supplement (PMC2659568)
Supplement: NIHMS81173-supplement-01.pdf [file NIHMS81173-supplement-01.pdf]

**Supplemental figure 1:** Changes in T cell subset distribution induced by OO-CR. Initiation of CR during advanced age does not lead to any detectable changes in T cell subset frequency in peripheral blood.

**Supplemental figure 2:** Impact of JO-CR on inflammatory cytokine secretion by T cells in RM females. (A, B) Frequency of CD4 CM and EM T cells that secrete IFN $\gamma$  (A) or TNF $\alpha$  (B).

Although statistical significance was not achieved, the data shows a consistent trend of increased prevalence of inflammatory cytokine-secreting CM and EM T cells in JO-CR female RM.

Similar results are shown for CD8 CM and EM that secrete IFN $\gamma$  (C) and TNF $\alpha$  (D) in response to anti-CD3 stimulation.

**Supplemental figure 3:** Impact of JO-CR on proliferative capacity of CD4 and CD8 T cells in RM females. Frequency of CD4 and CD8 T cells that have remained undivided following stimulation with anti-CD3 for four days. JO-CR does not result in a higher proportion of CD4 or CD8 T cells that can enter cell cycle following stimulation with immobilized anti-CD3 despite the increased frequency of naïve T cells.

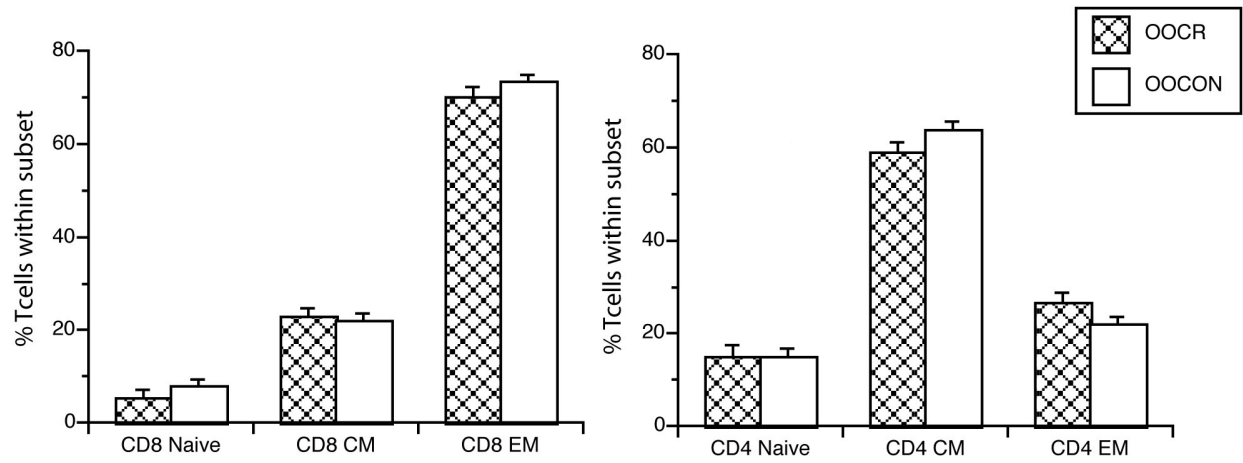

Messaoudi I., et al  
Supplemental Figure 1

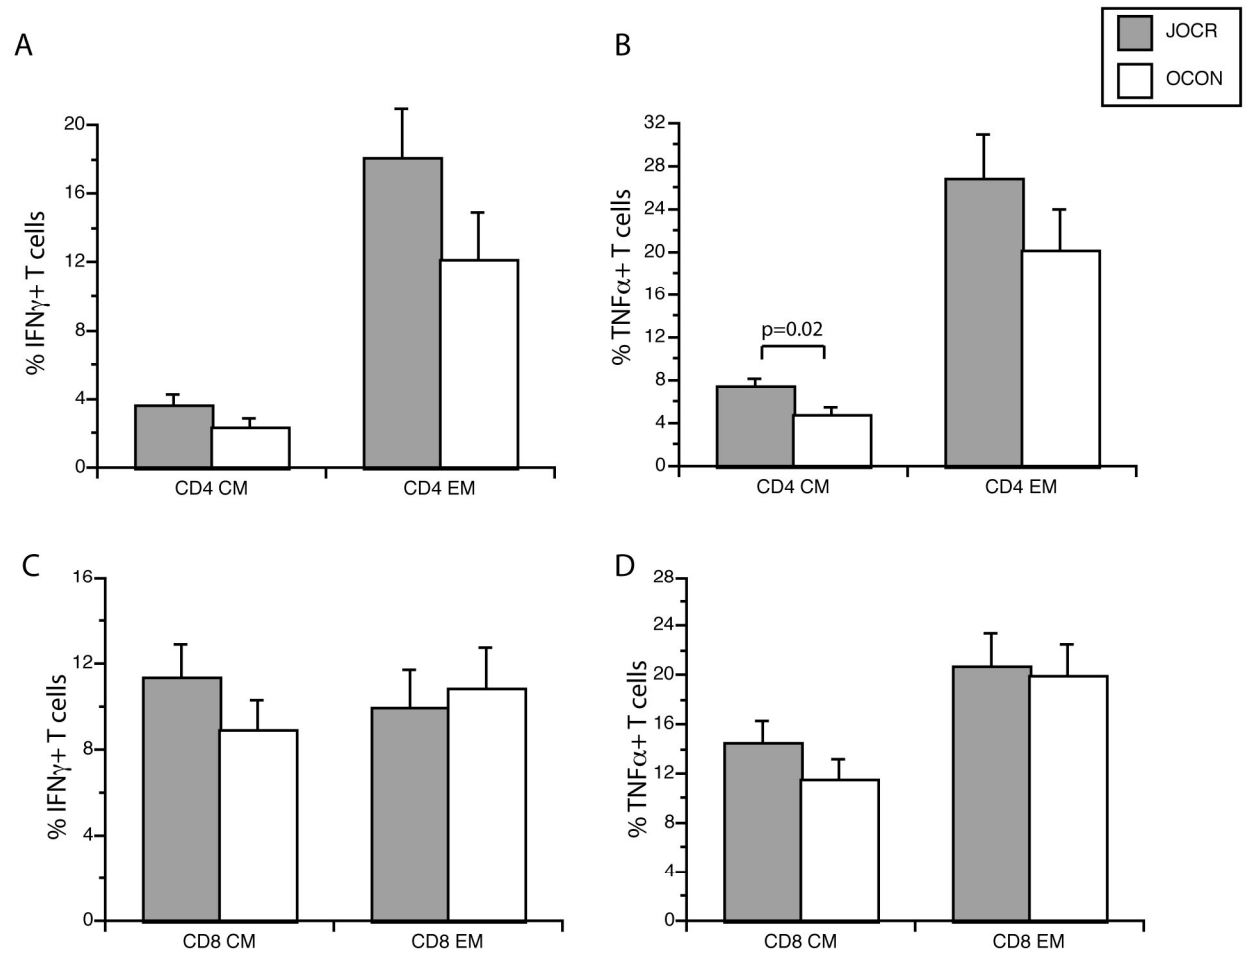

Messaoudi I., et al  
Supplemental Figure 2

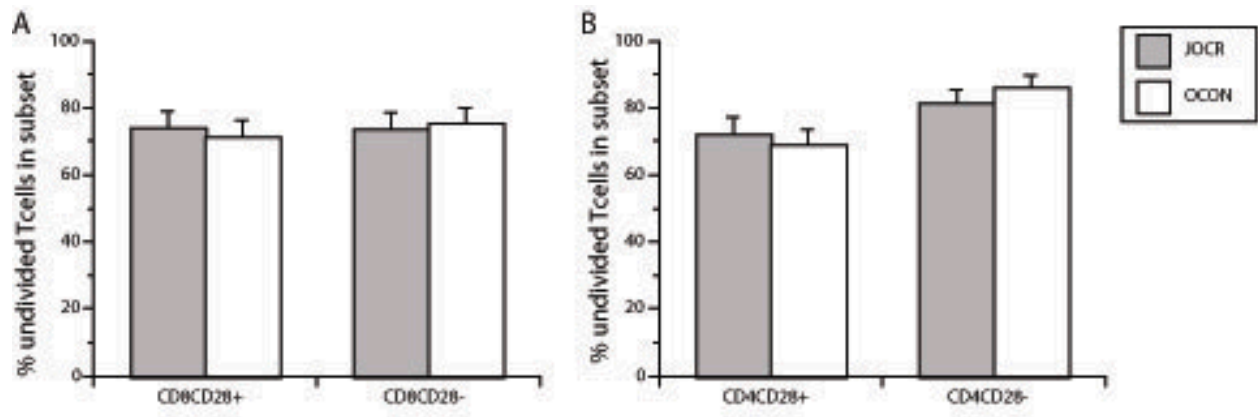

Messaoudi et al.,  
Supplemental Figure 3
